# Supplementary material for: Highly Potent and Selective Dopamine D4 Receptor Antagonists Potentially Useful for the Treatment of Glioblastoma
Source: PubMed Central journal article supplement (PMC9511495; doi:10.1021/acs.jmedchem.2c00840), 2022-09-13
Supplement: jm2c00840_si_001.pdf [file jm2c00840_si_001.pdf]

## SUPPORTING INFORMATION

### Highly Potent and Selective Dopamine D<sub>4</sub> Receptor Antagonists Potentially Useful for the Treatment of Glioblastoma

Pegi Pavletić,<sup>†</sup> Ana Semeano,<sup>‡</sup> Hideaki Yano,<sup>‡</sup> Alessandro Bonifazi,<sup>#</sup> Gianfabio Giorgioni,<sup>†</sup> Alessandro Piergentili,<sup>\*,†</sup> Wilma Quaglia,<sup>\*,†</sup> Maria Giovanna Sabbieti,<sup>§</sup> Dimitrios Agas,<sup>§</sup> Giorgio Santoni,<sup>†</sup> Roberto Pallini,<sup>⊥</sup>,<sup>°</sup> Lucia Ricci-Vitiani,<sup>&</sup> Emanuela Sabato,<sup>^</sup> Giulio Vistoli,<sup>^</sup> Fabio Del Bello.<sup>†</sup>

<sup>†</sup>*Scuola di Scienze del Farmaco e dei Prodotti della Salute, Università di Camerino, Via Madonna delle Carceri, 62032 Camerino, Italy*

<sup>‡</sup>*Department of Pharmaceutical Sciences, School of Pharmacy and Pharmaceutical Sciences, Bouvé College of Health Sciences, Center for Drug Discovery, Northeastern University, Boston, MA 02115, USA*

<sup>#</sup>*Medicinal Chemistry Section, Molecular Targets and Medications Discovery Branch, National Institute on Drug Abuse – Intramural Research Program, National Institutes of Health, 333 Cassell Drive, Baltimore, Maryland 21224, United States*

<sup>§</sup>*Scuola di Bioscienze e Medicina Veterinaria, Università di Camerino, Via Gentile III da Varano, 62032 Camerino, Italy*

<sup>⊥</sup>*Institute of Neurosurgery, Gemelli University Polyclinic Foundation, Scientific Hospitalization and Care Institute (IRCCS), Rome, 00168, Italy*

<sup>°</sup>*Institute of Neurosurgery, School of Medicine, Catholic University, Rome, 00168, Italy*

<sup>&</sup>*Department of Hematology, Oncology and Molecular Medicine, Istituto Superiore di Sanità, 00161 Rome, Italy*

<sup>^</sup>*Dipartimento di Scienze Farmaceutiche, Università degli Studi di Milano, Via Mangiagalli 25, 20133 Milano, Italy*

\*A.P.: e-mail: [alessandro.piergentili@unicam.it](mailto:alessandro.piergentili@unicam.it); W.Q.: e-mail [wilma.quaglia@unicam.it](mailto:wilma.quaglia@unicam.it).

#### Table of Contents:

Table S1: Elemental analysis results for compounds **7-33**.

Table S2: Physico-chemical descriptors for compounds **5-33**.

Figure S1: HPLC chromatograms and experimental details for compound **24**.

Figure S2: HPLC chromatograms and experimental details for compound **29**.

**Table S1.** Elemental analysis results for compounds **7-33**.

| Compd | Formula                                                                                                       | Calcd |      |       |      | Found |      |       |      |
|-------|---------------------------------------------------------------------------------------------------------------|-------|------|-------|------|-------|------|-------|------|
|       |                                                                                                               | C%    | H%   | N%    | S%   | C%    | H%   | N%    | S%   |
| 7     | C <sub>21</sub> H <sub>24</sub> N <sub>3</sub> .H <sub>2</sub> C <sub>2</sub> O <sub>4</sub>                  | 67.46 | 6.65 | 10.26 |      | 67.21 | 6.78 | 10.11 |      |
| 8     | C <sub>20</sub> H <sub>24</sub> N <sub>4</sub> .H <sub>2</sub> C <sub>2</sub> O <sub>4</sub>                  | 64.37 | 6.38 | 13.65 |      | 64.66 | 6.17 | 13.82 |      |
| 9     | C <sub>20</sub> H <sub>24</sub> N <sub>4</sub> .H <sub>2</sub> C <sub>2</sub> O <sub>4</sub>                  | 64.37 | 6.38 | 13.65 |      | 64.12 | 6.29 | 13.43 |      |
| 10    | C <sub>20</sub> H <sub>23</sub> N <sub>3</sub> O.H <sub>2</sub> C <sub>2</sub> O <sub>4</sub>                 | 64.22 | 6.12 | 10.21 |      | 63.99 | 6.36 | 10.34 |      |
| 11    | C <sub>20</sub> H <sub>23</sub> N <sub>3</sub> S.H <sub>2</sub> C <sub>2</sub> O <sub>4</sub>                 | 61.81 | 5.89 | 9.83  | 7.50 | 62.11 | 7.30 | 6.10  | 7.27 |
| 12    | C <sub>22</sub> H <sub>29</sub> N <sub>3</sub> .H <sub>2</sub> C <sub>2</sub> O <sub>4</sub>                  | 67.74 | 7.34 | 9.88  |      | 67.44 | 7.19 | 9.99  |      |
| 13    | C <sub>21</sub> H <sub>25</sub> N <sub>3</sub> O.H <sub>2</sub> C <sub>2</sub> O <sub>4</sub>                 | 62.99 | 7.93 | 10.02 |      | 63.25 | 7.90 | 10.19 |      |
| 14    | C <sub>23</sub> H <sub>29</sub> N <sub>3</sub> O.H <sub>2</sub> C <sub>2</sub> O <sub>4</sub>                 | 66.21 | 6.89 | 9.27  |      | 65.27 | 6.54 | 9.36  |      |
| 15    | C <sub>24</sub> H <sub>31</sub> N <sub>3</sub> O.H <sub>2</sub> C <sub>2</sub> O <sub>4</sub>                 | 66.79 | 7.11 | 8.99  |      | 66.41 | 7.02 | 9.09  |      |
| 16    | C <sub>23</sub> H <sub>29</sub> N <sub>3</sub> O.H <sub>2</sub> C <sub>2</sub> O <sub>4</sub>                 | 66.21 | 6.89 | 9.27  |      | 65.88 | 6.83 | 9.08  |      |
| 17    | C <sub>23</sub> H <sub>29</sub> N <sub>3</sub> O.H <sub>2</sub> C <sub>2</sub> O <sub>4</sub>                 | 66.21 | 6.89 | 9.27  |      | 66.10 | 6.81 | 9.33  |      |
| 18    | C <sub>23</sub> H <sub>29</sub> N <sub>3</sub> O.H <sub>2</sub> C <sub>2</sub> O <sub>4</sub>                 | 66.21 | 6.89 | 9.27  |      | 66.34 | 6.96 | 9.34  |      |
| 19    | C <sub>23</sub> H <sub>29</sub> N <sub>3</sub> O <sub>2</sub> .H <sub>2</sub> C <sub>2</sub> O <sub>4</sub>   | 63.95 | 6.66 | 8.95  |      | 64.11 | 6.47 | 9.12  |      |
| 20    | C <sub>23</sub> H <sub>29</sub> N <sub>3</sub> O <sub>2</sub> .H <sub>2</sub> C <sub>2</sub> O <sub>4</sub>   | 63.95 | 6.66 | 8.95  |      | 63.74 | 6.80 | 8.92  |      |
| 21    | C <sub>23</sub> H <sub>29</sub> N <sub>3</sub> O <sub>2</sub> .H <sub>2</sub> C <sub>2</sub> O <sub>4</sub>   | 63.95 | 6.66 | 8.95  |      | 63.90 | 6.41 | 8.76  |      |
| 22    | C <sub>22</sub> H <sub>26</sub> ClN <sub>3</sub> O.H <sub>2</sub> C <sub>2</sub> O <sub>4</sub>               | 60.82 | 5.96 | 7.48  |      | 60.74 | 5.83 | 7.60  |      |
| 23    | C <sub>22</sub> H <sub>26</sub> ClN <sub>3</sub> O.H <sub>2</sub> C <sub>2</sub> O <sub>4</sub>               | 60.82 | 5.96 | 7.48  |      | 60.52 | 6.01 | 7.61  |      |
| 24    | C <sub>22</sub> H <sub>26</sub> ClN <sub>3</sub> O.H <sub>2</sub> C <sub>2</sub> O <sub>4</sub>               | 60.82 | 5.96 | 7.48  |      | 61.02 | 6.06 | 7.50  |      |
| 25    | C <sub>22</sub> H <sub>26</sub> N <sub>4</sub> O <sub>3</sub> .H <sub>2</sub> C <sub>2</sub> O <sub>4</sub>   | 59.50 | 5.83 | 11.56 |      | 59.59 | 5.70 | 11.80 |      |
| 26    | C <sub>22</sub> H <sub>26</sub> N <sub>4</sub> O <sub>3</sub> .H <sub>2</sub> C <sub>2</sub> O <sub>4</sub>   | 59.50 | 5.83 | 11.56 |      | 59.38 | 5.83 | 11.34 |      |
| 27    | C <sub>22</sub> H <sub>26</sub> N <sub>4</sub> O <sub>3</sub> .H <sub>2</sub> C <sub>2</sub> O <sub>4</sub>   | 59.50 | 5.83 | 11.56 |      | 59.29 | 5.98 | 11.40 |      |
| 28    | C <sub>23</sub> H <sub>26</sub> N <sub>4</sub> O.H <sub>2</sub> C <sub>2</sub> O <sub>4</sub>                 | 64.64 | 7.00 | 14.96 |      | 64.78 | 7.01 | 15.20 |      |
| 29    | C <sub>21</sub> H <sub>26</sub> N <sub>4</sub> O.H <sub>2</sub> C <sub>2</sub> O <sub>4</sub>                 | 62.71 | 6.08 | 12.06 |      | 62.99 | 6.31 | 12.31 |      |
| 30    | C <sub>20</sub> H <sub>25</sub> N <sub>5</sub> O.H <sub>2</sub> C <sub>2</sub> O <sub>4</sub>                 | 59.85 | 6.16 | 15.86 |      | 59.98 | 6.00 | 16.03 |      |
| 31    | C <sub>22</sub> H <sub>25</sub> Cl <sub>2</sub> N <sub>3</sub> O.H <sub>2</sub> C <sub>2</sub> O <sub>4</sub> | 56.70 | 5.35 | 8.27  |      | 56.60 | 5.24 | 8.38  |      |
| 32    | C <sub>22</sub> H <sub>25</sub> Cl <sub>2</sub> N <sub>3</sub> O.H <sub>2</sub> C <sub>2</sub> O <sub>4</sub> | 56.70 | 5.35 | 8.27  |      | 56.51 | 5.31 | 8.12  |      |
| 33    | C <sub>22</sub> H <sub>25</sub> Cl <sub>2</sub> N <sub>3</sub> O.H <sub>2</sub> C <sub>2</sub> O <sub>4</sub> | 56.70 | 5.35 | 8.27  |      | 56.62 | 5.20 | 8.38  |      |

**Table S2.** Physico-chemical descriptors for compounds **5-33**.

| <b>Compd</b> | <b>Rotors</b> | <b>HbAcc</b> | <b>HbDon</b> | <b>PSA</b> | <b>LogP</b> | <b>MW</b> |
|--------------|---------------|--------------|--------------|------------|-------------|-----------|
| <b>5</b>     | 7             | 2            | 0            | 24.85      | 4.38        | 328.49    |
| <b>6</b>     | 5             | 2            | 0            | 28.95      | 3.17        | 349.47    |
| <b>7</b>     | 5             | 1            | 0            | 11.37      | 4.11        | 319.44    |
| <b>8</b>     | 5             | 2            | 0            | 22.55      | 3.24        | 320.43    |
| <b>9</b>     | 5             | 2            | 1            | 34.65      | 4.44        | 320.43    |
| <b>10</b>    | 5             | 3            | 0            | 30.51      | 4.83        | 321.42    |
| <b>11</b>    | 5             | 2            | 0            | 42.00      | 4.37        | 337.48    |
| <b>12</b>    | 5             | 1            | 0            | 11.74      | 4.91        | 335.49    |
| <b>13</b>    | 4             | 2            | 0            | 27.66      | 2.77        | 335.44    |
| <b>14</b>    | 6             | 2            | 0            | 27.49      | 3.61        | 363.50    |
| <b>15</b>    | 7             | 2            | 0            | 28.56      | 3.84        | 377.52    |
| <b>16</b>    | 5             | 2            | 0            | 27.46      | 3.45        | 363.50    |
| <b>17</b>    | 5             | 2            | 0            | 27.68      | 3.58        | 363.50    |
| <b>18</b>    | 5             | 2            | 0            | 28.21      | 3.60        | 363.50    |
| <b>19</b>    | 6             | 3            | 0            | 38.97      | 3.34        | 379.50    |
| <b>20</b>    | 6             | 3            | 0            | 40.59      | 3.25        | 379.50    |
| <b>21</b>    | 6             | 3            | 0            | 38.97      | 3.28        | 379.50    |
| <b>22</b>    | 5             | 2            | 0            | 28.21      | 3.77        | 383.91    |
| <b>23</b>    | 5             | 2            | 0            | 28.01      | 3.76        | 383.91    |
| <b>24</b>    | 5             | 2            | 0            | 27.64      | 3.71        | 383.91    |
| <b>25</b>    | 5             | 4            | 0            | 66.88      | 3.67        | 394.47    |
| <b>26</b>    | 5             | 4            | 0            | 68.32      | 3.71        | 394.47    |
| <b>27</b>    | 5             | 4            | 0            | 69.24      | 3.58        | 394.47    |
| <b>28</b>    | 5             | 2            | 0            | 47.04      | 2.47        | 374.48    |
| <b>29</b>    | 5             | 3            | 0            | 37.35      | 2.21        | 350.46    |
| <b>30</b>    | 5             | 4            | 0            | 47.96      | 1.58        | 351.45    |
| <b>31</b>    | 5             | 2            | 0            | 27.64      | 4.32        | 418.36    |
| <b>32</b>    | 5             | 2            | 0            | 28.57      | 4.28        | 418.36    |
| <b>33</b>    | 5             | 2            | 0            | 28.02      | 4.33        | 418.36    |

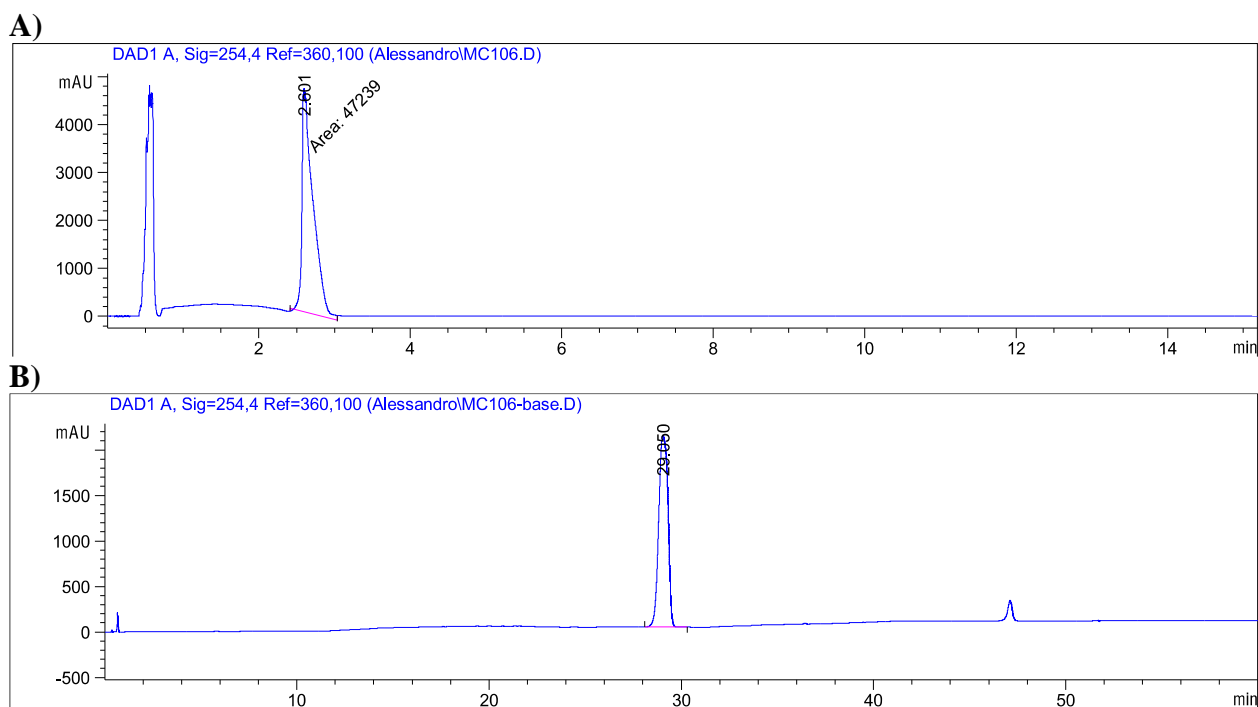

**Figure S1.** HPLC chromatograms of **24**. HPLC analysis was performed using an Agilent Technologies 1260 Infinity system coupled with DAD (Diode Array Detector). For each analytical HPLC run multiple DAD  $\lambda$  absorbance signals were measured in the range of 210-280 nm (representative chromatograms reported at  $\lambda$ 254 nm). Separation of the analyte was achieved using a Phenomenex Gemini C18 4.6 x 50 mm, 3  $\mu$ m column. **Method A)** mobile phase isocratic 30% ACN in water + 0.1% TFA; 15 min run; injection 20  $\mu$ L (0.5 mg/mL); temperature 40 C; purity >95%; **Method B)** mobile phase gradient 10%-80% ACN in water + 0.1% DEA; 60 min run; injection 20  $\mu$ L (0.5 mg/mL); temperature 40 C; purity >95%.

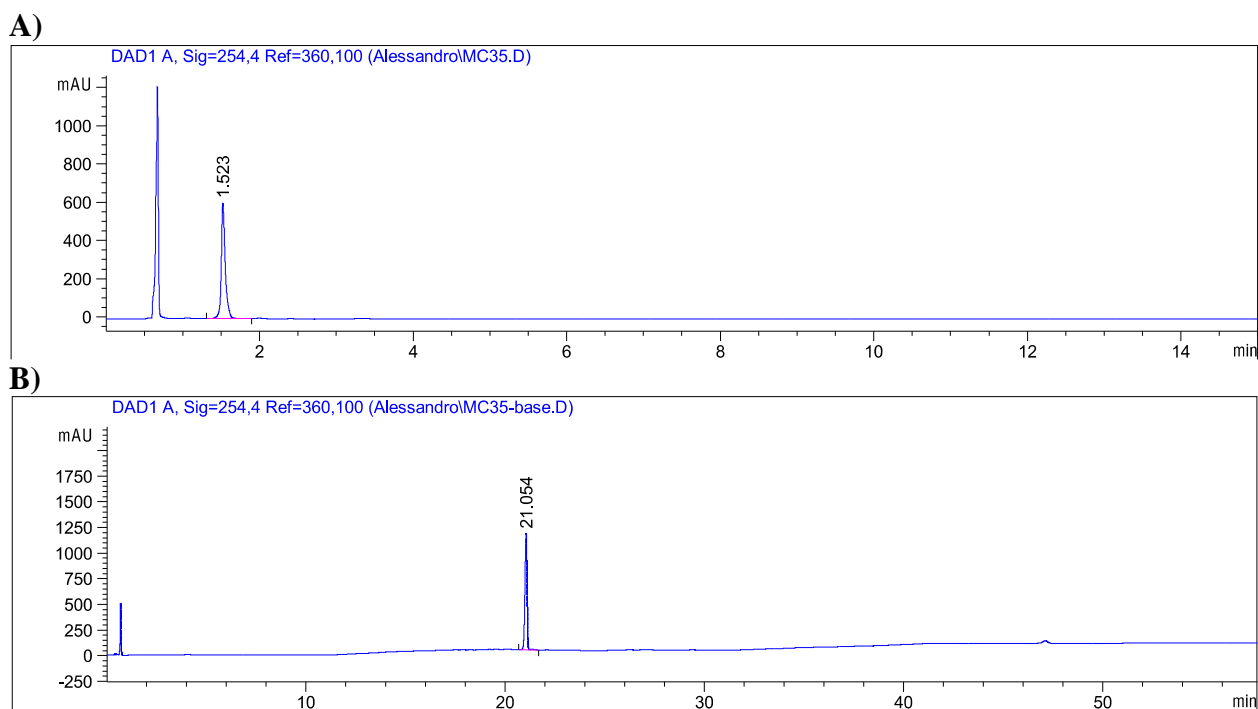

**Figure S2.** HPLC chromatograms of **29**. HPLC analysis was performed using an Agilent Technologies 1260 Infinity system coupled with DAD (Diode Array Detector). For each analytical HPLC run multiple DAD  $\lambda$  absorbance signals were measured in the range of 210-280 nm (representative chromatograms reported at  $\lambda$ 254 nm). Separation of the analyte was achieved using a Phenomenex Gemini C18 4.6 x 50 mm, 3  $\mu$ m column. **Method A)** mobile phase isocratic 15% ACN in water + 0.1% TFA; 15 min run; injection 20  $\mu$ L (0.5 mg/mL); temperature 40 C; purity >95%; **Method B)** mobile phase gradient 10%-80% ACN in water + 0.1% DEA; 60 min run; injection 20  $\mu$ L (0.5 mg/mL); temperature 40 C; purity >95%.
